# Supplementary material for: A novel route to luminescent opals for controlling spontaneous emission
Source: Royal Society of Chemistry journal article supplement (doi:10.1039/b908822a), 2009-01-01
Supplement: b908822a.pdf [file b908822a.pdf]

### Supporting information

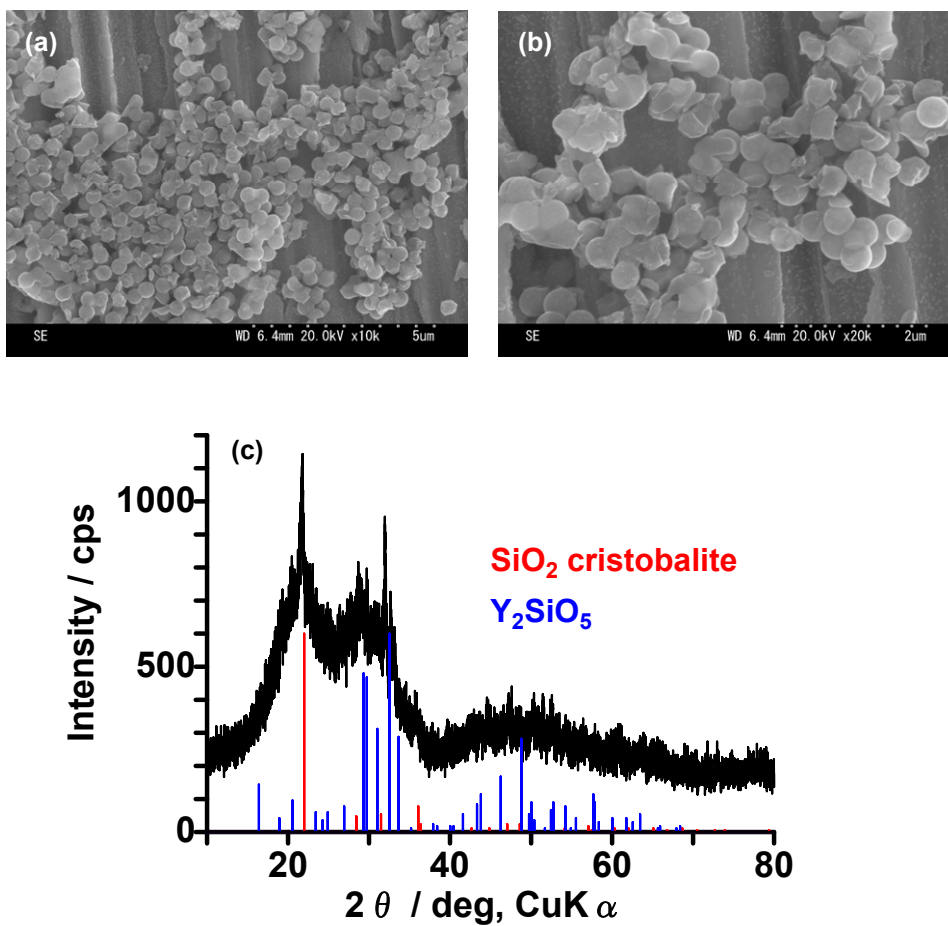

**Fig. S1.** (a, b) SEM images at different magnifications and (b) XRD pattern of composites calcined at 1200 °C.
